# Supplementary material for: Generation and characterisation of an Arabidopsis thaliana f3h/fls1/ans triple mutant that accumulates eriodictyol derivatives
Source: Springer Nature journal article supplement (doi:10.1186/s12870-024-04787-1), 2024-02-08
Supplement: 12870_2024_4787_MOESM3_ESM.pdf [file 12870_2024_4787_MOESM3_ESM.pdf]

**Supplementary Table S1: *A. thaliana* *f3h/fls1/ans* mutant *de novo* ONT genome assembly statistics.**

| Parameter             | Value                                                                                       |
|-----------------------|---------------------------------------------------------------------------------------------|
| Number of contigs     | 162                                                                                         |
| Maximal contig length | 16,321,703 bp                                                                               |
| Assembly size         | 160,571,748 bp (160.6 Mbp)                                                                  |
| GC content            | 39.11 %                                                                                     |
| N50                   | 8,170,251 bp                                                                                |
| N90                   | 246,021 bp                                                                                  |
| BUSCOs                | 95.5% complete BUSCOs<br>[Single: 88.3%. Duplicated: 7.2%]; Fragmented: 1.7%. Missing: 2.8% |

Abbreviations: ONT, Oxford Nanopore Technologies; BUSCOs, Benchmarking Universal Single-Copy Orthologs

**Supplementary Table S2: Oligonucleotide primers used in this work.**

| Gene       | Name   | Sequence (5'-3')               | Description                                                                   |
|------------|--------|--------------------------------|-------------------------------------------------------------------------------|
| <i>F3H</i> | MM70   | GAGGTGACTAGAGACGATGAATCC       | genotyping primer for the <i>F3H</i> wildtype and <i>tt6-2</i> mutant allele  |
|            | I250   | AATGACGATTGGGATTTTTGTAAC       | genotyping primer for the <i>F3H</i> wildtype allele                          |
|            | 8409   | ATATTGACCATCATACTCATTGC        | GABI-KAT T-DNA LB primer                                                      |
| <i>FLS</i> | UH9    | CACTGAGATCTGTATGAGCCGGTACACC   | genotyping primer for the <i>FLS</i> wildtype and <i>fls1-2</i> mutant allele |
|            | RSt647 | TTACACATATCAACACGTACTIONTTA    | genotyping primer for the <i>FLS</i> wildtype allele                          |
|            | RSt645 | CCGGATCGTATCGGTTTTTCG          | RIKEN Ds-transposon primer                                                    |
| <i>ANS</i> | B078   | TTCCCCTGTTTTAAGTTTTATT         | genotyping primer for the <i>ANS</i> wildtype and <i>tds4-4</i> mutant allele |
|            | B079   | AGAAAGACACAAACACATTATAAAA      | genotyping primer for the <i>ANS</i> wildtype allele                          |
|            | RS630  | GCGTGGACCGCTTGCTGCAACTCTCTCAGG | SALK T-DNA LB primer                                                          |
